# Supplementary material for: Dysregulation of nuclear receptor COUP-TFII impairs skeletal muscle development
Source: PubMed Central journal article supplement (PMC5466650; doi:10.1038/s41598-017-03475-5), 2017-06-09
Supplement: 41598_2017_3475_MOESM1_ESM.pdf [file 41598_2017_3475_MOESM1_ESM.pdf]

## **Dysregulation of nuclear receptor COUP-TFII impairs skeletal muscle development**

Hui-Ju Lee<sup>1</sup>, Chung-Yang Kao<sup>1</sup>, Shih-Chieh Lin<sup>1,4</sup>, Mafei Xu<sup>1</sup>, Xin Xie<sup>1</sup>, Sophia Y. Tsai<sup>1,2,3,\*</sup> and Ming-Jer Tsai<sup>1,2,3,\*</sup>

<sup>1</sup>Department of Molecular and Cellular Biology, <sup>2</sup>Program in Developmental Biology,

<sup>3</sup>Department of Medicine, Baylor College of Medicine, Houston, TX 77030, U.S.A.

<sup>4</sup>Department of Physiology, College of Medicine, National Cheng Kung University, Tainan 701, Taiwan R.O.C.

\* Correspondence:

Sophia Y. Tsai, Ph.D. and Ming-Jer Tsai, Ph.D.

Department of Molecular and Cellular Biology

Baylor College of Medicine

One Baylor Plaza, Houston Texas, 77030

stsai@bcm.tmc.edu (SYT) or mtsai@bcm.tmc.edu (MJT)

Phone: 713-798-6253 (MJT); 713-798-6251 (SYT)

Fax: 713-798-8227

Running Title:

COUP-TFII represses Nephronectin expression and FAK activity.

**Supplementary Table 1. Primer sequences for RT-qPCR**

| <b>RT-qPCR</b>    | <b>Primer Sequences</b>                                       |
|-------------------|---------------------------------------------------------------|
| <b>mCOUP-TFII</b> | 5'-ATGGACCACATACGGATCTTCC-3'; 5'-ACAGGCATCTGAGGTGAACAGG-3'    |
| <b>mPax7</b>      | 5'-CTCAGTGAGTTCGATTAGCCG-3'; 5'-AGACGGTTCCTTTGTCGC-3'         |
| <b>mMyf5</b>      | 5'-CACCACCAACCCTAACCAGAG-3'; 5'-AGGCTGTAATAGTTCTCCACCTG-3'    |
| <b>mMyomaker</b>  | 5'-TTCCTCCCGACAGTGAGCAT-3'; 5'-GCACAGCACAGACAAACCAG-3'        |
| <b>mMyoD1</b>     | 5'-CGGGACATAGACTTGACAGGC-3'; 5'-TCGAAACACGGGTCATCATAGA-3'     |
| <b>mMyogenin</b>  | 5'-CGATCTCCGCTACAGAGGC-3'; 5'-GTTGGGACCGAACTCCAGT-3'          |
| <b>mMRF4</b>      | 5'-ATTCTTGAGGGTGCGGATTC-3'; 5'-CCTTAGCAGTTATCACGAGGC-3'       |
| <b>mMYH2</b>      | 5'-GACCTATCTG CTAGAGAAGTCC-3'; 5'-CAGCAGCATTTGATCAGCTC-3'     |
| <b>mMYH3</b>      | 5'-TCACCATGCTGTGAACGCTCTC-3'; 5'-AGTGCTGTCTTGGTAGCTTTGTA-3'   |
| <b>mMYH8</b>      | 5'-CAACAAGTGTATAATGCGGTGG-3'; 5'-GCTGCTTGGTGTCCAGCTGC-3'      |
| <b>mCkm</b>       | 5'-AGACAAGCATAAGACCGACCT-3'; 5'-AGGCAGAGTGTAACCCTTGAT-3'      |
| <b>mNpnt</b>      | 5'-TGTCTCAACGGATACATGCTGC-3'; 5'-TCACAGCCATACTGACAGTTTG-3'    |
| <b>mIlgβ1D</b>    | 5'-TTCATGACAG AAGGGAATTT GC-3'; 5'-ACCAGCTTTACGTCCATAGTTTG-3' |
| <b>mCav 3</b>     | 5'-TTGAAGACGTGATTGCGGAG-3'; 5'-ACCCAGCAGTGTAGACAACAG-3'       |
| <b>m18S rRNA</b>  | 5'-GTAACCCGTTGAACCCATT-3'; 5'-CCATCCAATCGGTAGTAGCG-3'         |

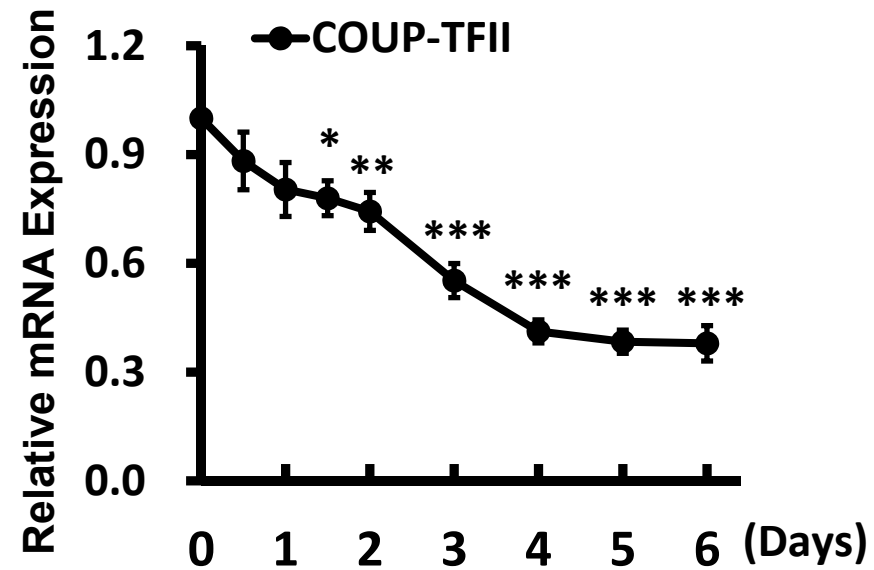

**Supplementary Figure S1.** Quantitative RT-PCR examination of COUP-TFII mRNA expression during myogenic differentiation in C2C12 cells. C2C12 cells were placed in the differentiation medium (DM, 2% horse serum) and incubated for the indicated time points. Data are shown as mean  $\pm$  SEM. One-way ANOVA followed by Bonferroni's Multiple Comparison Test; \*  $p < 0.05$ , \*\*  $p < 0.01$ , \*\*\*  $p < 0.001$ , compared to day 0.

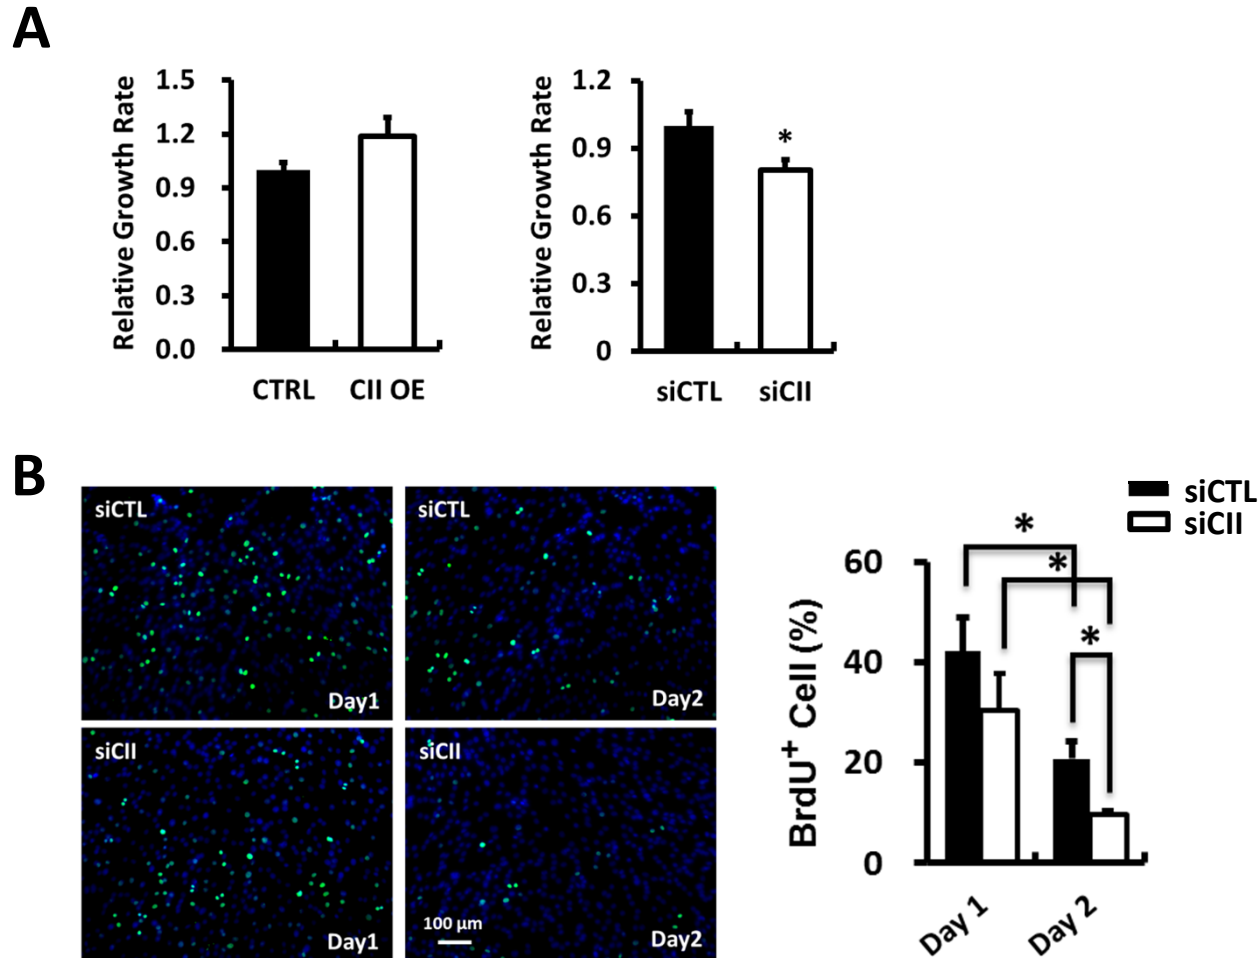

**Supplementary Figure S2. (A)** MTS examination of the growth rate of COUP-TFII overexpressing and COUP-TFII silencing myoblasts. Same amount of cells were seeded in 10% FBS culture medium for 2 days and the relative cell number were measured by O.D.490. **(B)** BrdU incorporation assay measured the proliferation rate of COUP-TFII silencing cells during differentiation. 10  $\mu$ M BrdU was added at indicated post-differentiation time points and incubation for 12 hours followed by anti-BrdU immunofluorescence staining. Right panel shows the quantified results. Data are shown as mean  $\pm$  SEM. Two-tailed Student's t-test; \*  $p < 0.05$ .

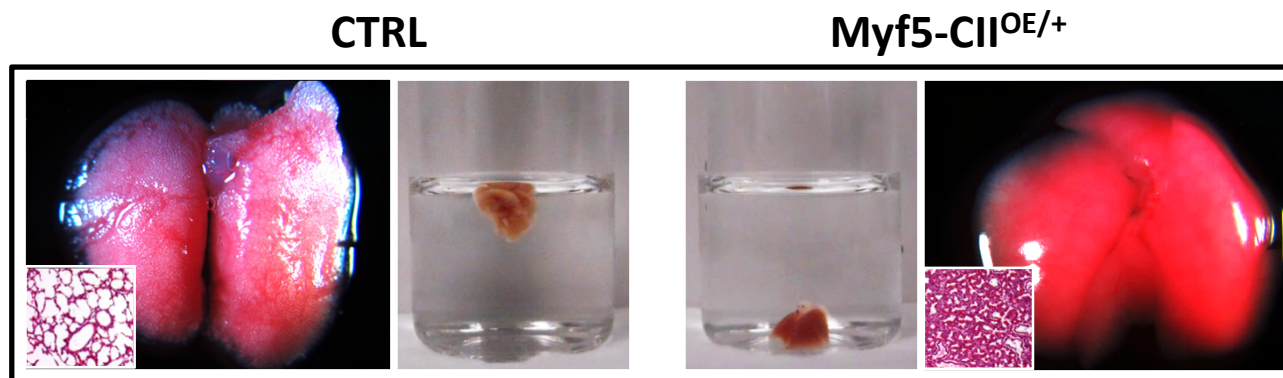

**Supplementary Figure S3.** Control lungs float, *Myf5-CII<sup>OE/+</sup>* lungs sink to the bottom which means *Myf5-CII<sup>OE/+</sup>* lungs were not inflated with air. Lung tissues H&E staining were shown in the bottom square.

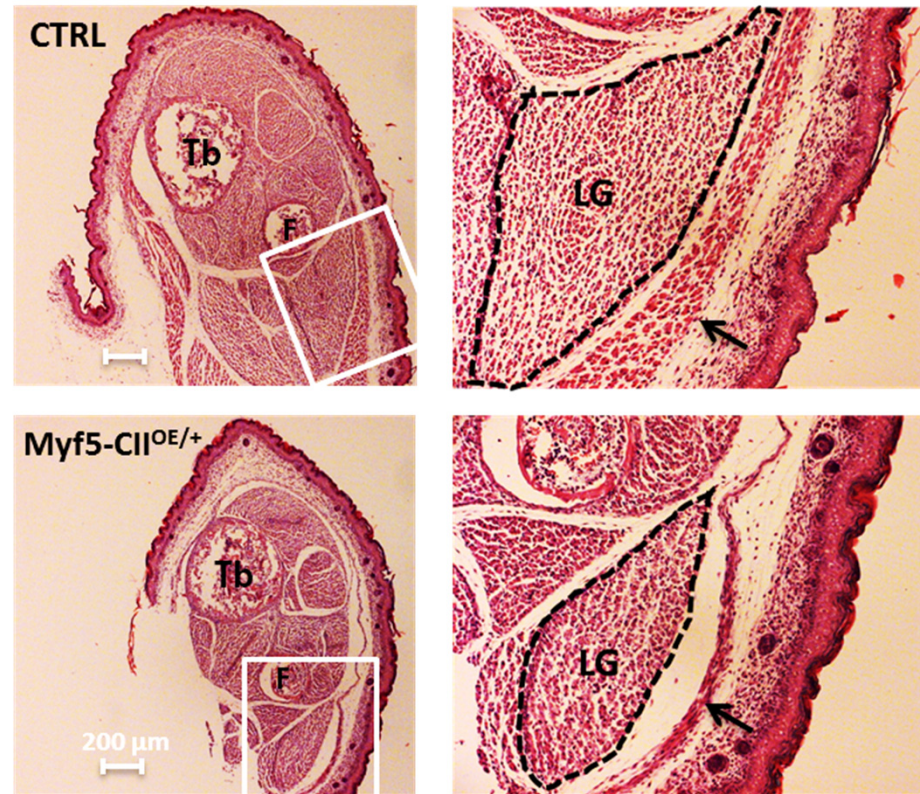

**Supplementary Figure S4.** H&E staining of hind-limb cross-section of E18.5 embryo. Enlarged square area of the gastrocnemius lateralis muscle was shown in the right panel. **Tb:** Tibia, **F:** Fibula, **LG:** gastrocnemius lateralis muscle. **Arrow:** biceps femoris muscle.

**A**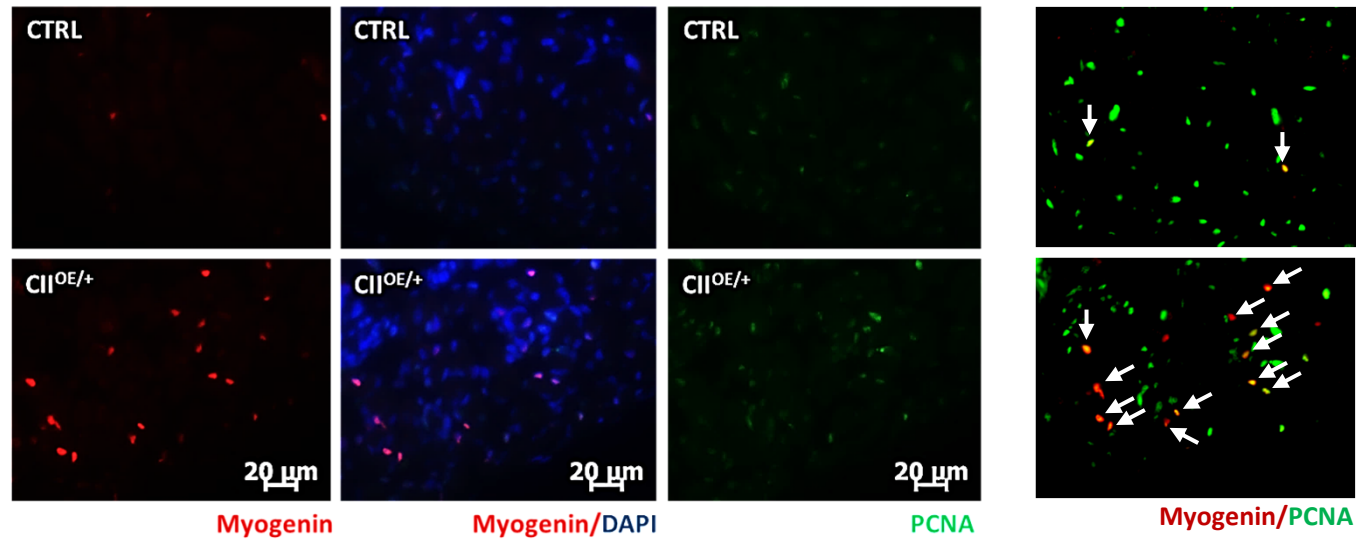**B**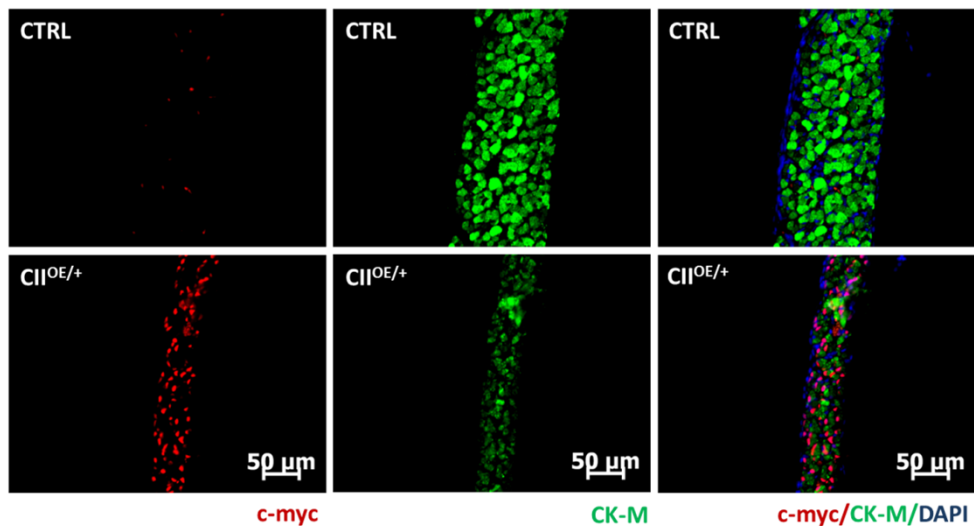**C**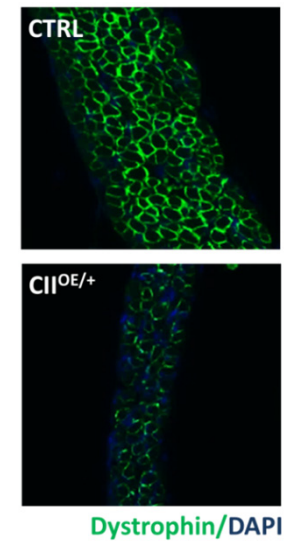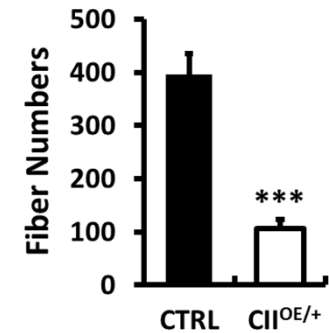

**Supplementary Figure S5.** Immunofluorescence staining showing that **(A)** Proliferating Myogenin<sup>+</sup> myoblasts were increased; **(B)** muscle form Creatinine Kinase (CK-M) and **(C)** muscle fibers were reduced in the diaphragm muscle of *Myf5-CII<sup>OE/+</sup>* mice. Right panel shows the quantitative fiber number/field. N=4. PCNA: proliferating cell nuclear antigen. Arrow head: Myogenin<sup>+</sup>/PCNA<sup>+</sup> cells. C-myc stained the ectopic overexpressed COUP-TFII. Dystrophin stained the periphery of muscle fibers.

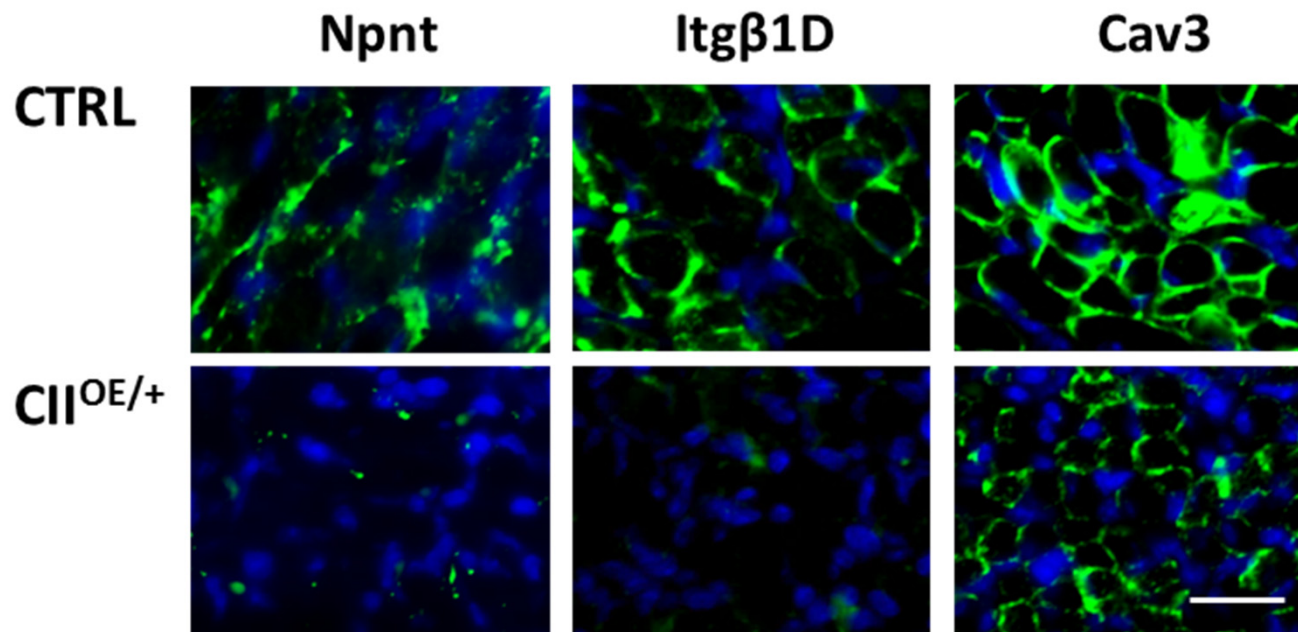

**Supplementary Figure S6.** Immunofluorescence staining of Nephronectin, Integrin  $\beta$ 1D and Caveolin 3 protein levels in the skeletal muscle of E18.5 control and *Myf5-CII<sup>OE/+</sup>* embryo. Green fluorescence stained for the indicated proteins and DAPI was used for nuclear counterstain. Scale bar= 20  $\mu$ m.



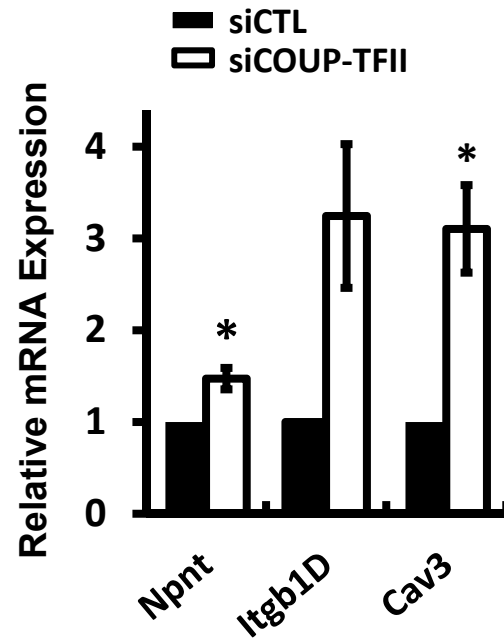

**Supplementary Figure S7.** Quantitative RT-PCR examination of Nephronectin (Npnt), Integrin  $\beta$ 1D (Itgb1D) and Caveolin 3 (Cav3) mRNA expression in COUP-TFII silencing C2C12 cells before induction (Day 0). Data are shown as mean  $\pm$  SEM. Two-tailed Student's *t*-test; \*  $p < 0.05$ , compared to control cells.

**Day1 (post-differentiation)**

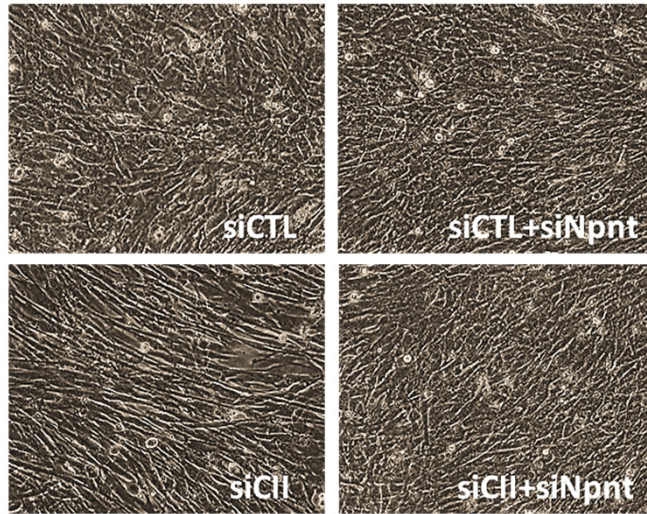

**Day2 (post-differentiation)**

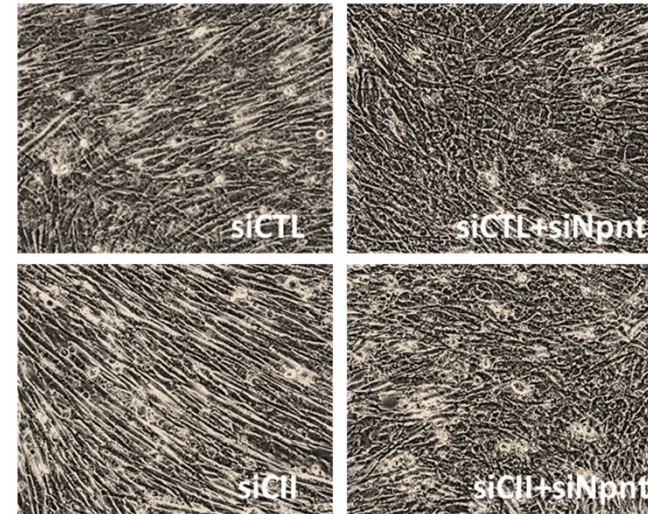

**Supplementary Figure S8.** Phase contrast images of control, COUP-TFII silencing, Npnt silencing and double silencing C2C12 cells one day and two days post-differentiation. Cells were pre-silencing of indicated genes 3 days and reseeded before serum withdrawal.
